# Supplementary material
Source: publisher figshare collection journal article supplement (https://frontiersin.figshare.com/ndownloader/files/33893165)

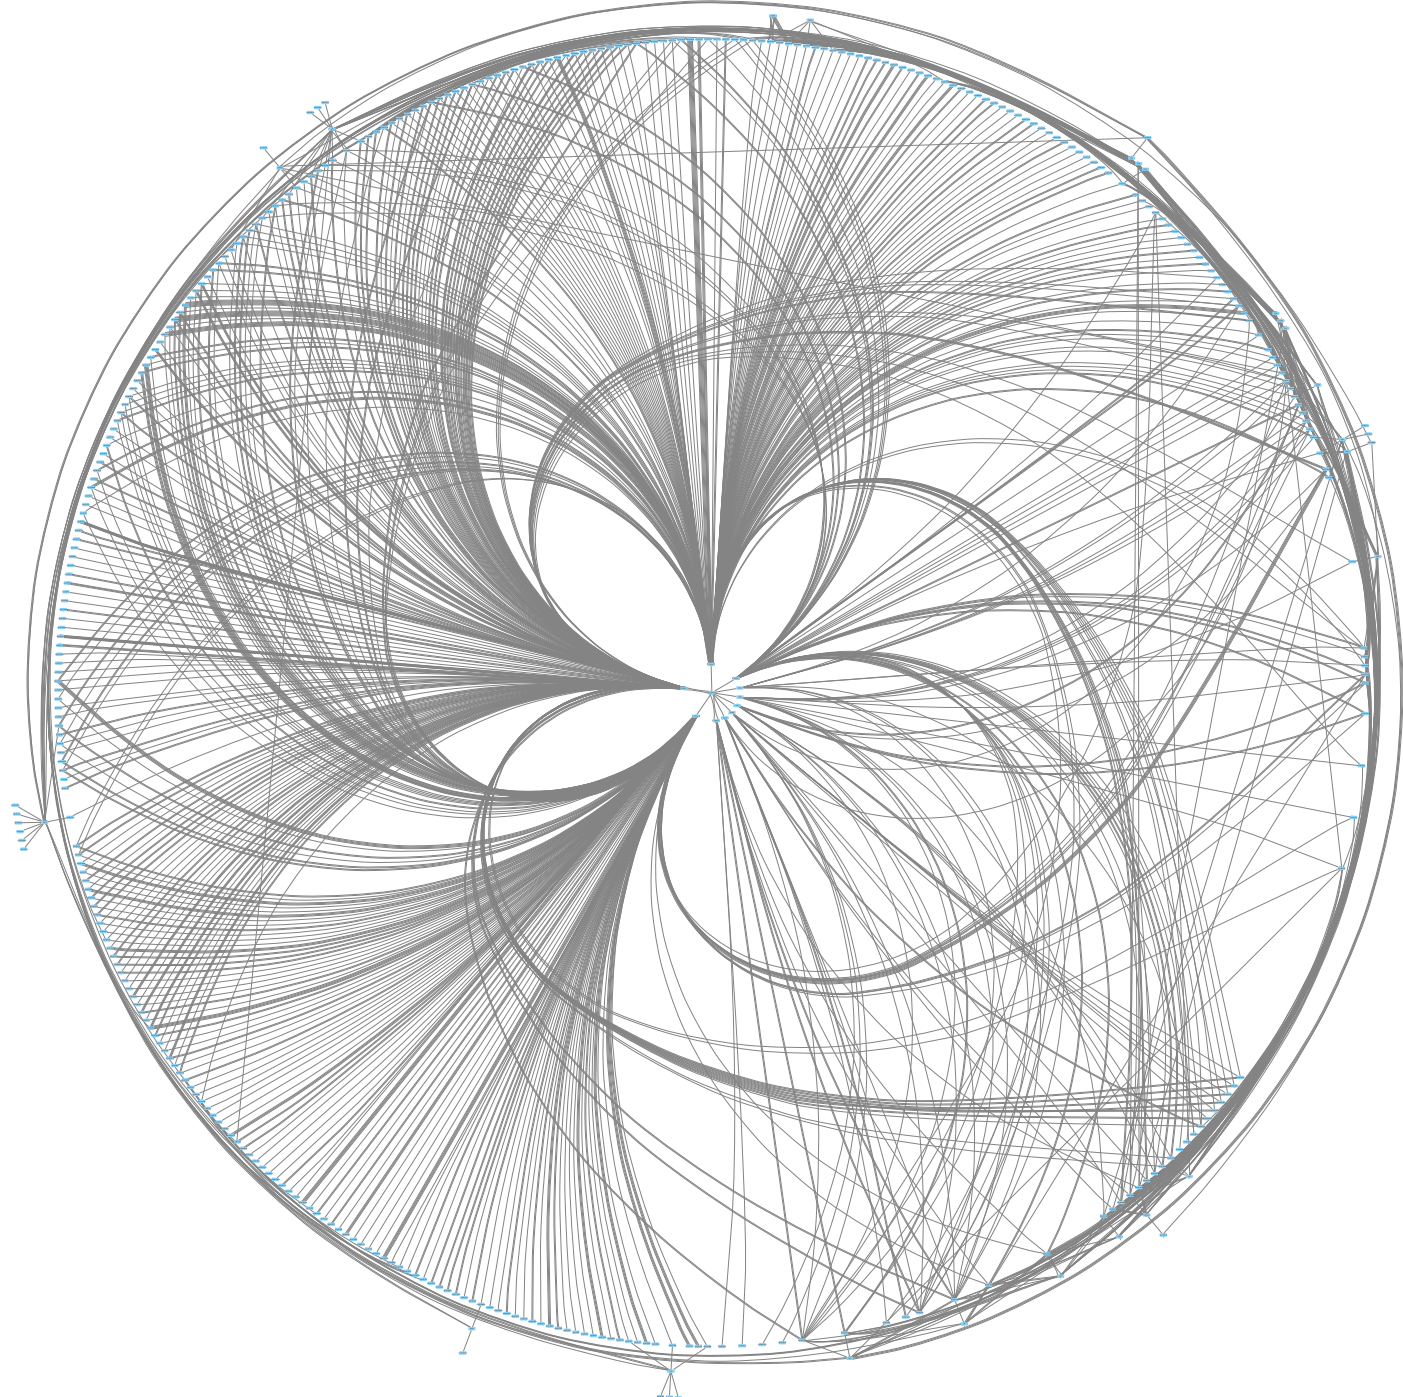

Supplement: Supplementary file [file 33893165]
